# Supplementary material for: Immunomodulatory Properties of Umbilical Cord Blood-Derived Small Extracellular Vesicles and Their Therapeutic Potential for Inflammatory Skin Disorders
Source: MDPI journal article supplement (doi:10.3390/ijms22189797), 2021-09-10
Supplement: s1 [file s1]

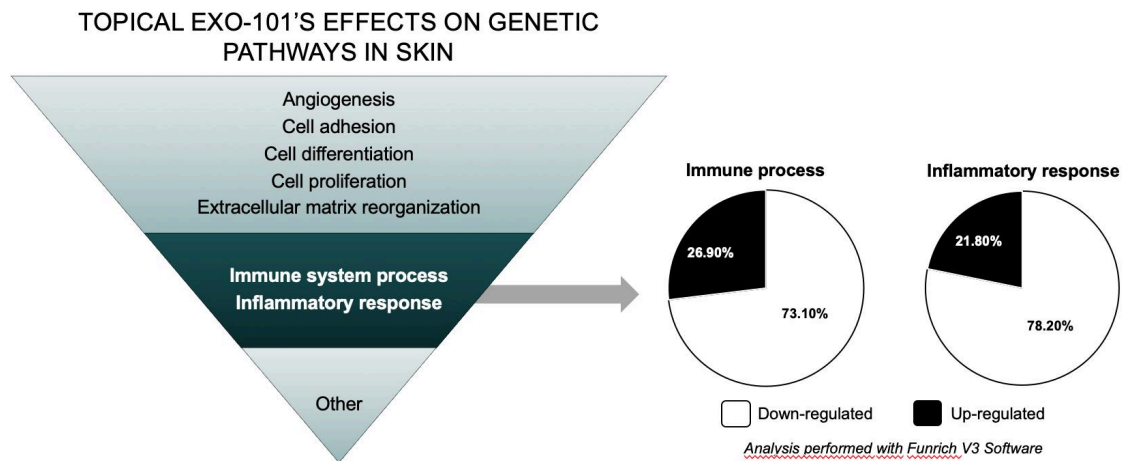

**Figure S1: Effects of Exo-101 treatment on gene expression of chronic skin wounds.**

STZ-induced diabetic mice were treated topically with  $2.5 \times 10^9$  particles/mL Exo-101, twice per day for 15 days, after which skin mRNA was extracted. The inverted triangle on the left represents the different major processes affected by Exo-101 treatment. The circles on the right illustrate the percentage of inflammation- and immune system-related genes up- or down-regulated after Exo-101 treatment.

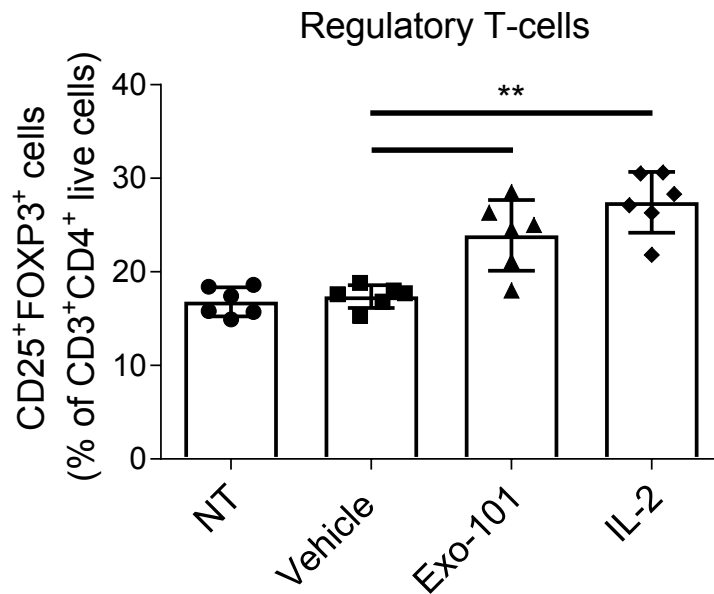

**Figure S2: Effects of Exo-101 treatment on the percentage of regulatory T-cells (Treg).**

Human PBMC were activated with  $\alpha$ CD3/ $\alpha$ CD28 and treated for 6 days with Exo-101 ( $1 \times 10^{10}$  particles/mL) or IL-2 (100 IU/ml) and TGF- $\beta$  (5ng/mL) (n=6). Treg were defined as CD3<sup>+</sup>CD4<sup>+</sup>CD25<sup>+</sup>FOXP3<sup>+</sup> cells. Comparison with Figure 1ab, where Treg were identified based on the expression markers CD25 and CD127. All results are presented as mean  $\pm$  SD.

\*\* $p \leq 0.01$ . NT, non-treated.

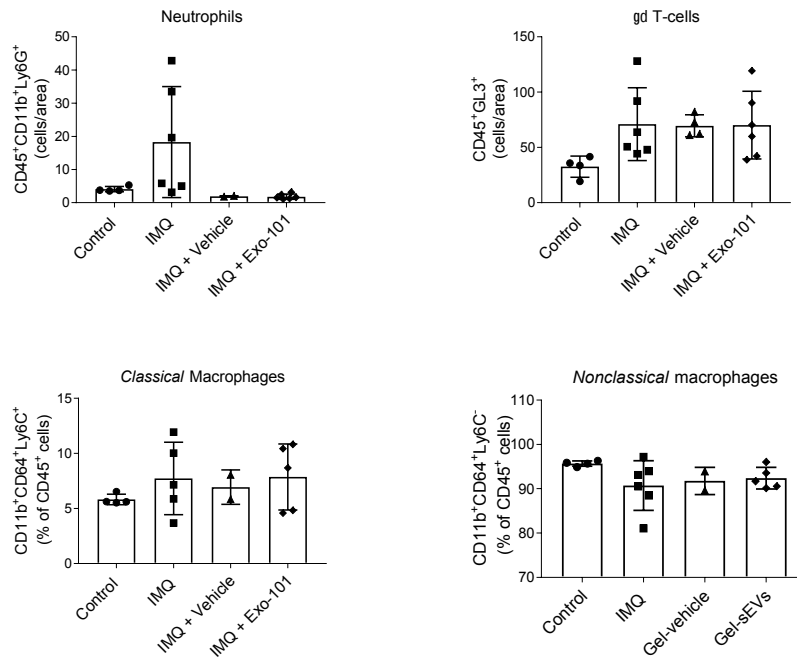

**Figure S3: Cell populations in the skin of imiquimod- and Exo-101 treated animals.** Flow cytometry identification of neutrophils,  $\gamma\delta$  T-cells and macrophages in digested skin of mice treated with imiquimod (IMQ) and/or Exo-101 as indicated ( $n \geq 2$ ). All results are presented as mean  $\pm$  SD.

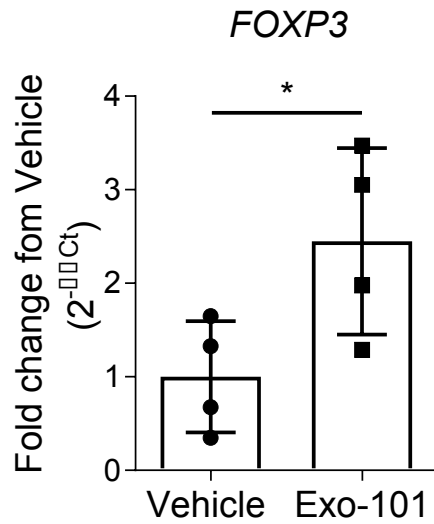

**Figure S4: FOXP3 expression in the skin of Exo-101 treated mice with chronic wounds.**

STZ-induced diabetic mice (n=4) were treated topically with  $2.5 \times 10^9$  particles/mL Exo-101 or vehicle, twice per day for 15 days, after which skin mRNA was extracted. All results are presented as mean  $\pm$  SD. \* $p \leq 0.05$ .
